# Supplementary material for: Engineering Yarrowia lipolytica to produce biodiesel from raw starch
Source: PubMed Central journal article supplement (PMC4571081; doi:10.1186/s13068-015-0335-7), 2015-09-15

# Additional file 2: Figure S1

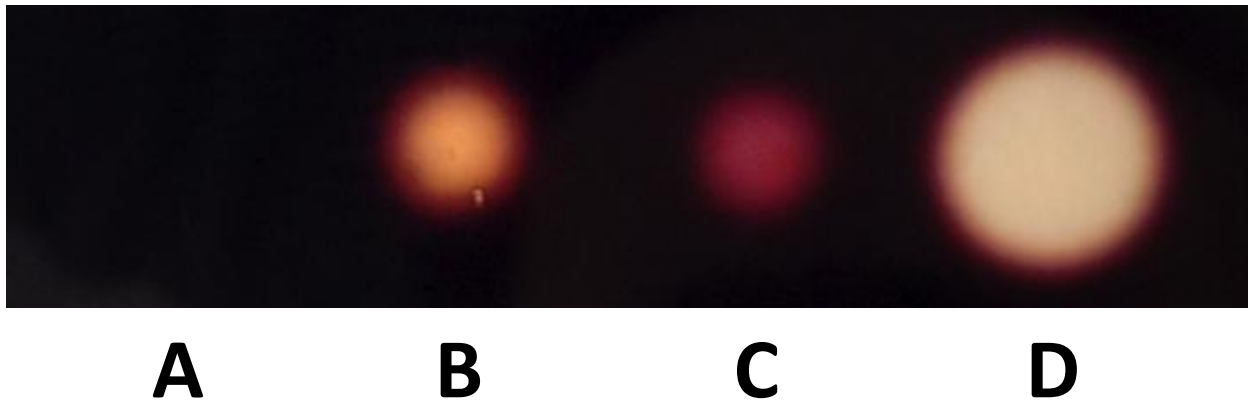

Supplement: 13068_2015_335_MOESM2_ESM.pdf [file 13068_2015_335_MOESM2_ESM.pdf]
